# Supplementary material for: Levetiracetam Suppresses the Infiltration of Neutrophils and Monocytes and Downregulates Many Inflammatory Cytokines during Epileptogenesis in Pilocarpine-Induced Status Epilepticus Mice
Source: MDPI journal article supplement (doi:10.3390/ijms23147671), 2022-07-12
Supplement: s1 [file s1]

Mouse XL Cytokine Array Coordinates

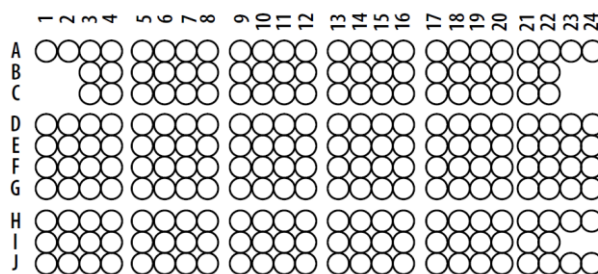

| position | Analyte/Control                      | position | Analyte/Control    | position | Analyte/Control       | position | Analyte/Control                 |
|----------|--------------------------------------|----------|--------------------|----------|-----------------------|----------|---------------------------------|
| A1       | Reference Spot                       | C17      | CX3CL1/Fractalkine | F5       | IGFBP-6               | H15      | MMP-9                           |
| A2       |                                      | C18      |                    | F6       |                       | H16      |                                 |
| A3       | Adiponectin/Acrp30                   | C19      | CXCL1/KC           | F7       | IL-1 $\alpha$ /IL-1F1 | H17      | Myeloperoxidase                 |
| A4       |                                      | C20      |                    | F8       |                       | H18      |                                 |
| A5       | Amphiregulin                         | C21      | CXCL2/MIP-2        | F9       | IL-1 $\beta$ /IL-1F2  | H19      | Osteopontin (OPN)               |
| A6       |                                      | C22      |                    | F10      |                       | H20      |                                 |
| A7       | Angiopoietin-1                       | D1       | CXCL9/MIG          | F11      | IL-1 $\alpha$ /IL-1F3 | H21      | Osteoprotegerin/TNFRSF 11B      |
| A8       |                                      | D2       |                    | F12      |                       | H22      |                                 |
| A9       | Angiopoietin-2                       | D3       | CXCL10/IP-10       | F13      | IL-2                  | H23      | PD-ECGF/Thymidine phosphorylase |
| A10      |                                      | D4       |                    | F14      |                       | H24      |                                 |
| A11      | Angiopoietin-like 3                  | D5       | CXCL11/I-TAC       | F15      | IL-3                  | I1       | PDGF-BB                         |
| A12      |                                      | D6       |                    | F16      |                       | I2       |                                 |
| A13      | BAFF/BLyS/TNFSF13B                   | D7       | CXCL13/BLC/BCA-1   | F17      | IL-4                  | I3       | Pentraxin 2/SAP                 |
| A14      |                                      | D8       |                    | F18      |                       | I4       |                                 |
| A15      | C1q R1/CD93                          | D9       | CXCL16             | F19      | IL-5                  | I5       | Pentraxin 3/TSG-14              |
| A16      |                                      | D10      |                    | F20      |                       | I6       |                                 |
| A17      | CCL2/JE/MCP-1                        | D11      | Cystatin C         | F21      | IL-6                  | I7       | Periostin/OSF-2                 |
| A18      |                                      | D12      |                    | F22      |                       | I8       |                                 |
| A19      | CCL3/CCL4/MIP-1a/b                   | D13      | DKK-1              | F23      | IL-7                  | I9       | Pref-1/DLK-1/FA1                |
| A20      |                                      | D14      |                    | F24      |                       | I10      |                                 |
| A21      | CCL5/RANTES                          | D15      | DPPIV/CD26         | G1       | IL-10                 | I11      | Proliferin                      |
| A22      |                                      | D16      |                    | G2       |                       | I12      |                                 |
| A23      | Reference Spot                       | D17      | EGF                | G3       | IL-11                 | I13      | Proprotein Convertase 9/PCSK9   |
| A24      |                                      | D18      |                    | G4       |                       | I14      |                                 |
| B3       | CCL6/C10                             | D19      | Endoglin/CD105     | G5       | IL-12 p40             | I15      | RAGE                            |
| B4       |                                      | D20      |                    | G6       |                       | I16      |                                 |
| B5       | CCL11/Eotaxin                        | D21      | Endostatin         | G7       | IL-13                 | I17      | RBP4                            |
| B6       |                                      | D22      |                    | G8       |                       | I18      |                                 |
| B7       | CCL12/MCP-5                          | D23      | Fetuin A/AHSG      | G9       | IL-15                 | I19      | Reg3G                           |
| B8       |                                      | D24      |                    | G10      |                       | I20      |                                 |
| B9       | CCL17/TARC                           | E1       | FGF acidic         | G11      | IL-17A                | I21      | Resistin                        |
| B10      |                                      | E2       |                    | G12      |                       | I22      |                                 |
| B11      | CCL19/MIP-3 $\beta$                  | E3       | FGF-21             | G13      | IL-22                 | J1       | Reference Spot                  |
| B12      |                                      | E4       |                    | G14      |                       | J2       |                                 |
| B13      | CCL20/MIP-3 $\alpha$                 | E5       | Flt-3 Ligand       | G15      | IL-23                 | J3       | E-Selectin/CD62E                |
| B14      |                                      | E6       |                    | G16      |                       | J4       |                                 |
| B15      | CCL21/6CKine                         | E7       | Gas 6              | G17      | IL-27 p28             | J5       | P-Selectin/CD62P                |
| B16      |                                      | E8       |                    | G18      |                       | J6       |                                 |
| B17      | CCL22/MDC                            | E9       | G-CSF              | G19      | IL-28A/B              | J7       | Serpine E1/PAI-1                |
| B18      |                                      | E10      |                    | G20      |                       | J8       |                                 |
| B19      | CD14                                 | E11      | GDF-15             | G21      | IL-33                 | J9       | Serpine F1/PEDF                 |
| B20      |                                      | E12      |                    | G22      |                       | J10      |                                 |
| B21      | CD40/TNFRSF5                         | E13      | GM-CSF             | G23      | LDL R                 | J11      | Thrombopoietin                  |
| B22      |                                      | E14      |                    | G24      |                       | J12      |                                 |
| C3       | CD160                                | E15      | HGF                | H1       | Leptin                | J13      | TIM-1/KIM-1/HAVCR               |
| C4       |                                      | E16      |                    | H2       |                       | J14      |                                 |
| C5       | Chemerin                             | E17      | ICAM-1/CD54        | H3       | LIF                   | J15      | TNF- $\alpha$                   |
| C6       |                                      | E18      |                    | H4       |                       | J16      |                                 |
| C7       | Chitinase 3-like 1                   | E19      | INF- $\gamma$      | H5       | Lipocalin-2/NGAL      | J17      | VCAM-1/CD106                    |
| C8       |                                      | E20      |                    | H6       |                       | J18      |                                 |
| C9       | Coagulation Factor III/Tissue Factor | E21      | IGFBP-1            | H7       | LIX                   | J19      | VEGF                            |
| C10      |                                      | E22      |                    | H8       |                       | J20      |                                 |
| C11      | Complement Component C5/C5a          | E23      | IGFBP-2            | H9       | M-CSF                 | J21      | WISP-1/CCN4                     |
| C12      |                                      | E24      |                    | H10      |                       | J22      |                                 |
| C13      | Complement Factor D                  | F1       | IGFBP-3            | H11      | MMP-2                 | J23      | Negative Control (no antibody)  |
| C14      |                                      | F2       |                    | H12      |                       | J24      |                                 |
| C15      | C-Reactive Protein/CRP               | F3       | IGFBP-5            | H13      | MMP-3                 |          |                                 |
| C16      |                                      | F4       |                    | H14      |                       |          |                                 |

**Figure S1. Schematic representation of the Mouse XL Cytokine Array.**

Capture and control antibodies have been spotted in duplicate on nitrocellulose membranes. The table shows a list and coordinates of analytes and controls.

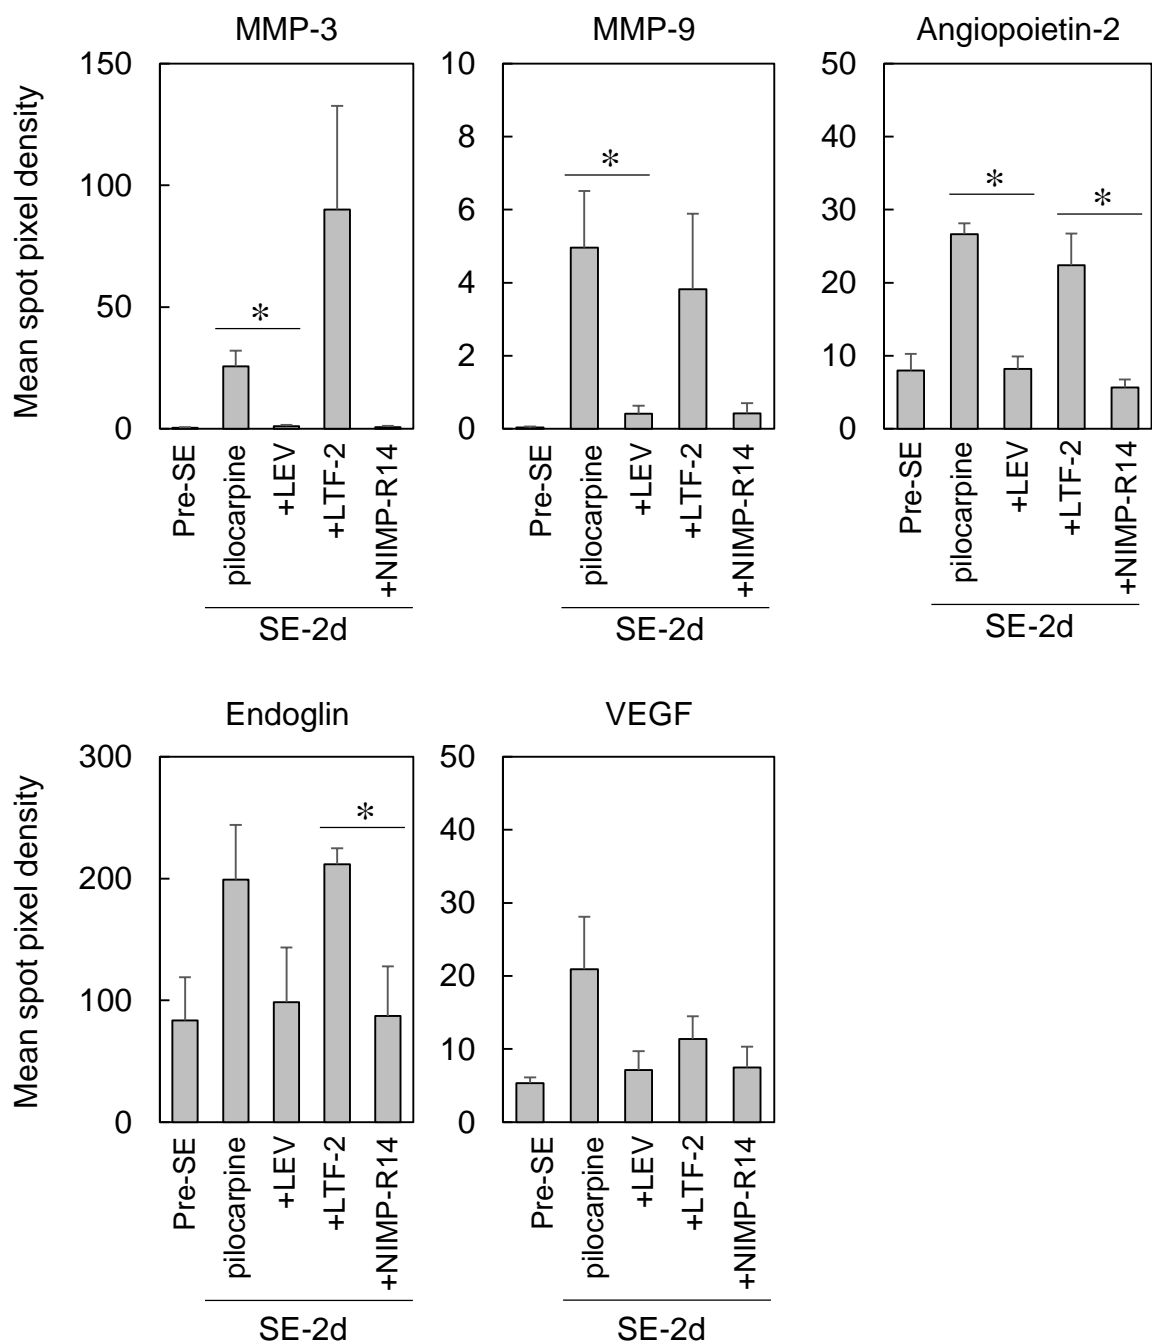

**Figure S2. Expression of cytokines associated with BBB disruption.**

The expression levels of cytokines were determined by measuring pixel intensities of spots in cytokine arrays.  $n = 3$  mice per group. Data are means  $\pm$  SEMs.  $*p < 0.05$ , unpaired  $t$  test.

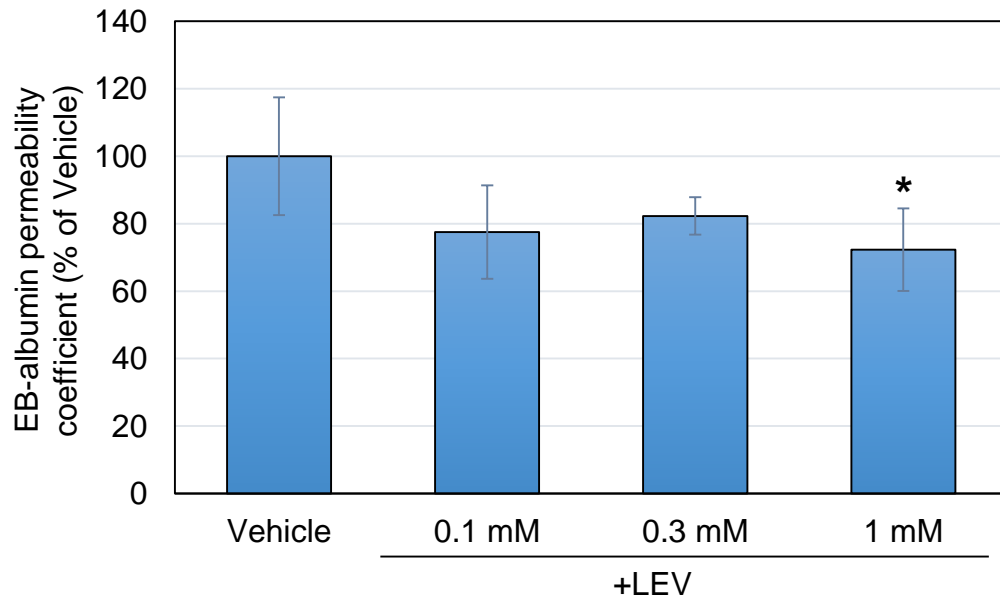

**Figure S3 The influence of LEV treatment on the permeability of EBA in *in vitro* BBB model.** The permeability of EBA in the adult rat brain capillary endothelial cells BBB model. Four independent experiments were performed. Data were analyzed for significant differences by one way ANOVA post-hoc Dunnett's test. \*  $P=0.016$  significantly different from each corresponding control.

## Supplementary Materials and Methods.

### ***In vitro* evaluation of barrier functions**

Rat brain capillary endothelial cells obtained from 8 week-old Wister rats were seeded on the insides of inserts (Corning, Midland, MI, USA) and maintained in culture medium previously described (PMID: 23523792, DOI: 10.1016/j.bbrc.2013.03.036). The brain capillary endothelial cells were treated with 0.1, 0.3, and 1 mM of LEV for 24 h into the inside of the insert. After that, the permeability coefficients to Evans blue albumin (EBA) were measured for evaluating barrier function in the endothelial cells layers as previously described (PMID: 23523792, DOI: 10.1016/j.bbrc.2013.03.036).
